# Supplementary material
Source: publisher figshare collection journal article supplement (https://acs.figshare.com/ndownloader/files/29052563)
Supplement: Supplementary file 1 [file 29052563]

## Supporting Information

# Photochemical Synthesis of Selenium Nanospheres of Tunable Size and Colloidal Stability with Simple Diketones

*Li Zhang,<sup>†</sup> Yonghai Gan,<sup>†</sup> Bingdang Wu,<sup>†</sup> Zhihao Chen,<sup>†</sup> Jie Ren,<sup>†</sup> Chi Zhang,<sup>†</sup> Shujuan Zhang,<sup>\*,†</sup>  
Chuncheng Chen<sup>‡</sup> and Bingcai Pan<sup>†</sup>*

<sup>†</sup> State Key Laboratory of Pollution Control and Resource Reuse, School of the Environment,  
Nanjing University, Nanjing 210023, China. E-mail: [sjzhang@nju.edu.cn](mailto:sjzhang@nju.edu.cn)

<sup>‡</sup> Key Laboratory of Photochemistry, CAS Research/Education Center for Excellence in  
Molecular Sciences, Institute of Chemistry, Chinese Academy of Sciences, Beijing 100190,  
China; University of Chinese Academy of Sciences, Beijing 100049, China

\* Corresponding author. Tel.: +86 25 89680389

E-mail address: [sjzhang@nju.edu.cn](mailto:sjzhang@nju.edu.cn) (S.J. Zhang)

**This file contains 4 tables and 5 figures.**

**Table S1.** Acute toxicity data of the tested ketones and their main degradation products with rat as the testing species.

| Chemical    | LD <sub>50</sub> (rat, oral) (mg/kg) <sup>a</sup> |
|-------------|---------------------------------------------------|
| Acetone     | 5800 <sup>b</sup>                                 |
| AcAc        | 1000 <sup>c</sup>                                 |
| BD          | 1580 <sup>b</sup>                                 |
| PD          | 3000 <sup>b</sup>                                 |
| HD          | 2076 <sup>b</sup>                                 |
| I-2959      | 4082 <sup>b</sup>                                 |
| BP          | > 10000 <sup>b</sup>                              |
| Formic acid | 1100 <sup>b</sup>                                 |
| Acetic acid | 3310 <sup>b</sup>                                 |

<sup>a</sup> LD<sub>50</sub>, the median lethal dose, represents the dose at which a substance is lethal for 50% of the tested subjects at the given route of delivery. A substance that is innocuous in one species could be lethal in another. The data with rat as the testing species is selected for comparison.

<sup>b</sup> The National Library of Medicine's Hazardous Substances Data Bank (HSDB). See the following web site: <https://pubchem.ncbi.nlm.nih.gov/>

<sup>a</sup> Ballantyne, B.; Cawley, T. J. Toxicology Update. *J. Appl. Toxicol.* **2001**, *21*, 165–171.

**Table S2.** HPLC conditions for the determination of AcAc, BD, I-2959 and BP

| <b>Chemical</b> | <b><math>\lambda</math><br/>(nm)</b> | <b>RT <sup>a</sup><br/>(min)</b> | <b>Volume <sup>b</sup><br/>(<math>\mu</math>L)</b> | <b>Column <sup>c</sup></b>            | <b>Temp <sup>d</sup><br/>(°C)</b> | <b>Mobile phase (v/v)</b>                 | <b>Flow rate<br/>(mL·min<sup>-1</sup>)</b> |
|-----------------|--------------------------------------|----------------------------------|----------------------------------------------------|---------------------------------------|-----------------------------------|-------------------------------------------|--------------------------------------------|
| AcAc            | 274                                  | 3.55                             | 20                                                 | C8, 5 $\mu$ m<br>4.6 $\times$ 150 mm  | 25                                | CH <sub>3</sub> OH/1 mM CuCl <sub>2</sub> | 0.24/0.36                                  |
| BD              | 315                                  | 4.17                             | 20                                                 | C18, 5 $\mu$ m<br>4.6 $\times$ 100 mm | 25                                | CH <sub>3</sub> CN/H <sub>2</sub> O       | 0.21/0.39                                  |
| I-2959          | 280                                  | 1.66                             | 1                                                  | C18, 5 $\mu$ m<br>4.6 $\times$ 100 mm | 25                                | CH <sub>3</sub> CN/H <sub>2</sub> O       | 0.24/0.06                                  |
| BP              | 258                                  | 7.09                             | 5                                                  | C18, 5 $\mu$ m<br>4.6 $\times$ 100 mm | 30                                | CH <sub>3</sub> CN/H <sub>2</sub> O       | 0.47/0.53                                  |

<sup>a</sup> Retention time, <sup>b</sup> Injection volume, <sup>c</sup> Agilent Eclipse Plus, <sup>d</sup> Column temperature

**Table S3.** Basic chemical information of the tested ketones

| Name    | MW     | Structure                                                                          | Formula                                        | $S^a$<br>(g·L <sup>-1</sup> ) | $\lambda_{\max}^b$<br>(nm) | $\epsilon^c$<br>(M <sup>-1</sup> ·cm <sup>-1</sup> ) |
|---------|--------|------------------------------------------------------------------------------------|------------------------------------------------|-------------------------------|----------------------------|------------------------------------------------------|
| Acetone | 58.08  |   | C <sub>3</sub> H <sub>6</sub> O                | Miscible                      | 263                        | 17                                                   |
| AcAc    | 100.12 |   | C <sub>5</sub> H <sub>8</sub> O <sub>2</sub>   | 160                           | 274                        | 1800                                                 |
| BD      | 86.09  |   | C <sub>4</sub> H <sub>6</sub> O <sub>2</sub>   | 2                             | 271                        | 32                                                   |
| I-2959  | 224.25 |   | C <sub>12</sub> H <sub>16</sub> O <sub>4</sub> | 10                            | 280                        | 14100                                                |
| BP      | 182.22 |  | C <sub>13</sub> H <sub>10</sub> O              | Insoluble<br>(< 1)            | 258                        | 16610                                                |

<sup>a</sup> Water solubility, cited from <https://www.chemicalbook.com/> and

<http://www.xtgchem.cn/upload/20110629045632.PDF>

<sup>b</sup> The maximum absorption wavelength

<sup>c</sup> The molar extinction coefficient at the maximum absorption wavelength

**Table S4.** The electrical energy consumption (EE/O) data of the synthesis methods for nano Se.

| Method                          | Chemicals <sup>a</sup>                                    | Energy input | EE/O (kWh·L <sup>-1</sup> ) |          |       |
|---------------------------------|-----------------------------------------------------------|--------------|-----------------------------|----------|-------|
|                                 |                                                           |              | Energy                      | Chemical | Total |
| UV/AcAc                         | AcAc, Na <sub>2</sub> SeO <sub>3</sub>                    | UV           | 1.8                         | 0.05     | 1.8   |
| UV/BD                           | BD, Na <sub>2</sub> SeO <sub>3</sub>                      | UV           | 1.8                         | 0.13     | 1.9   |
| Hydrothermal route <sup>b</sup> | Glucose, SeO <sub>2</sub> , PVP, EtOH, NH <sub>4</sub> OH | Heating      | 7                           | 20       | 27    |

<sup>a</sup> The price of the chemicals was obtained from <https://www.alibaba.com/> (2021.7.3).

<sup>b</sup> Xie, Q.; Dai, Z.; Huang, W. W.; Zhang, W.; Ma, D. K.; Hu, X. K.; Qian, Y. T. Large-Scale Synthesis and Growth Mechanism of Single-Crystal Se Nanobelts. *Cryst. Growth Des.* **2006**, 6 (6), 1514–1517.

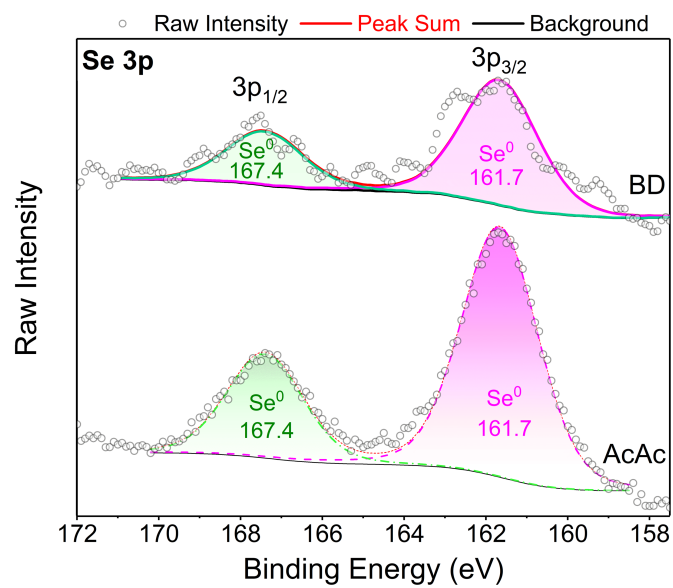

**Figure S1.** XPS of Se3p spectra of the SeNSs obtained with AcAc and BD.

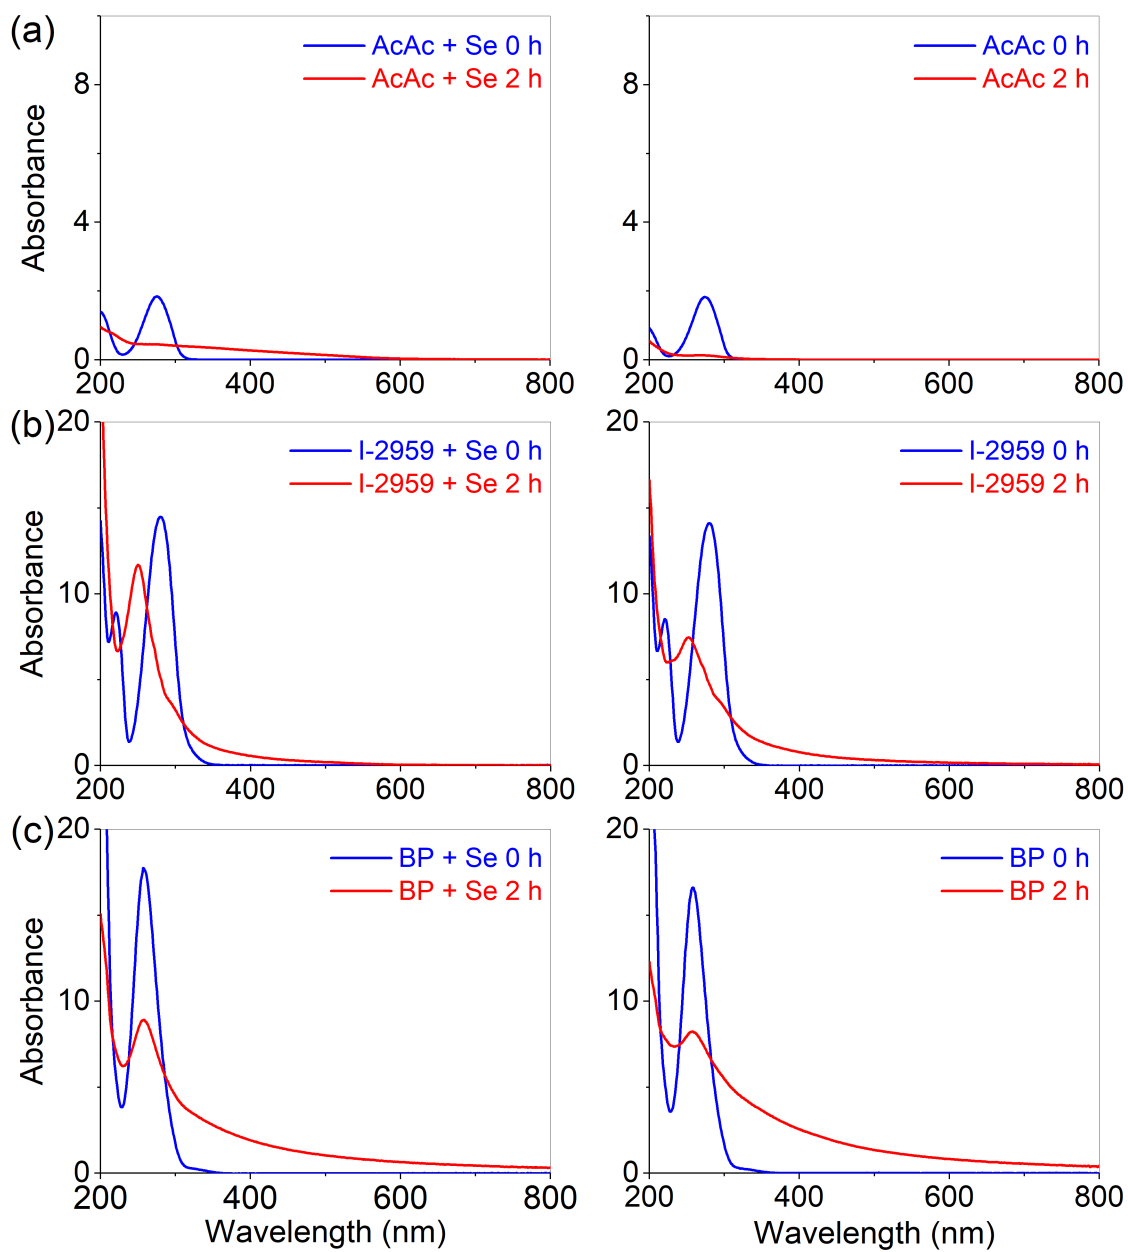

**Figure S2.** UV-vis spectra of raw and UV irradiated (2 h at  $8.6 \text{ mW} \cdot \text{cm}^{-2}$  at 365 nm) ketone (1.0 mM) solutions w/ or w/o Se(IV) (0.2 mM).

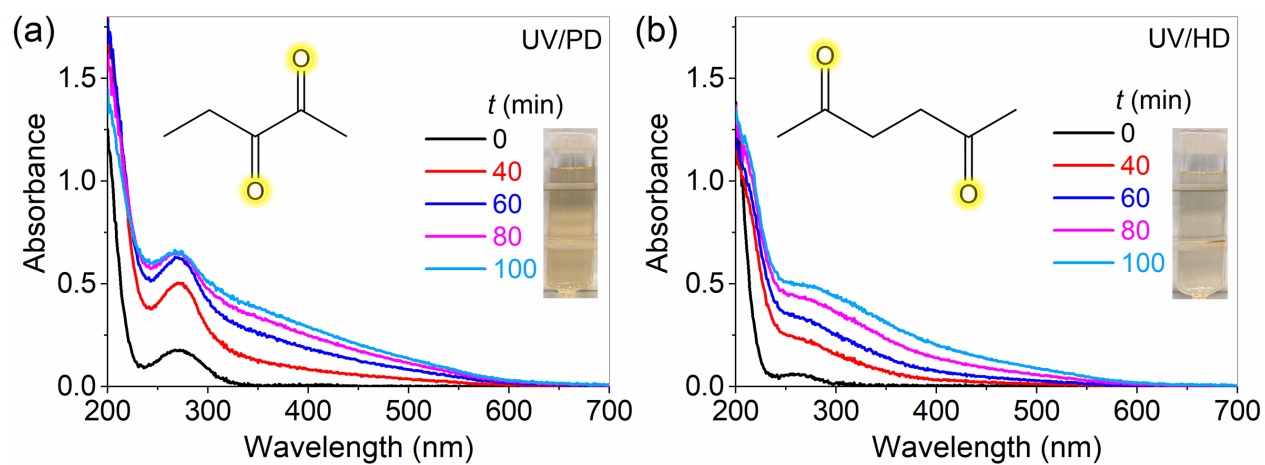

**Figure S3.** UV-vis spectra of the colloidal solutions of SeNSs obtained with 2,3-pentanedione (PD) and 2,5-hexanedione (HD). [Ketone] = 1.0 mM, [Se(IV)] = 0.2 mM, light intensity:  $7.0 \text{ mW} \cdot \text{cm}^{-2}$  at 365 nm.

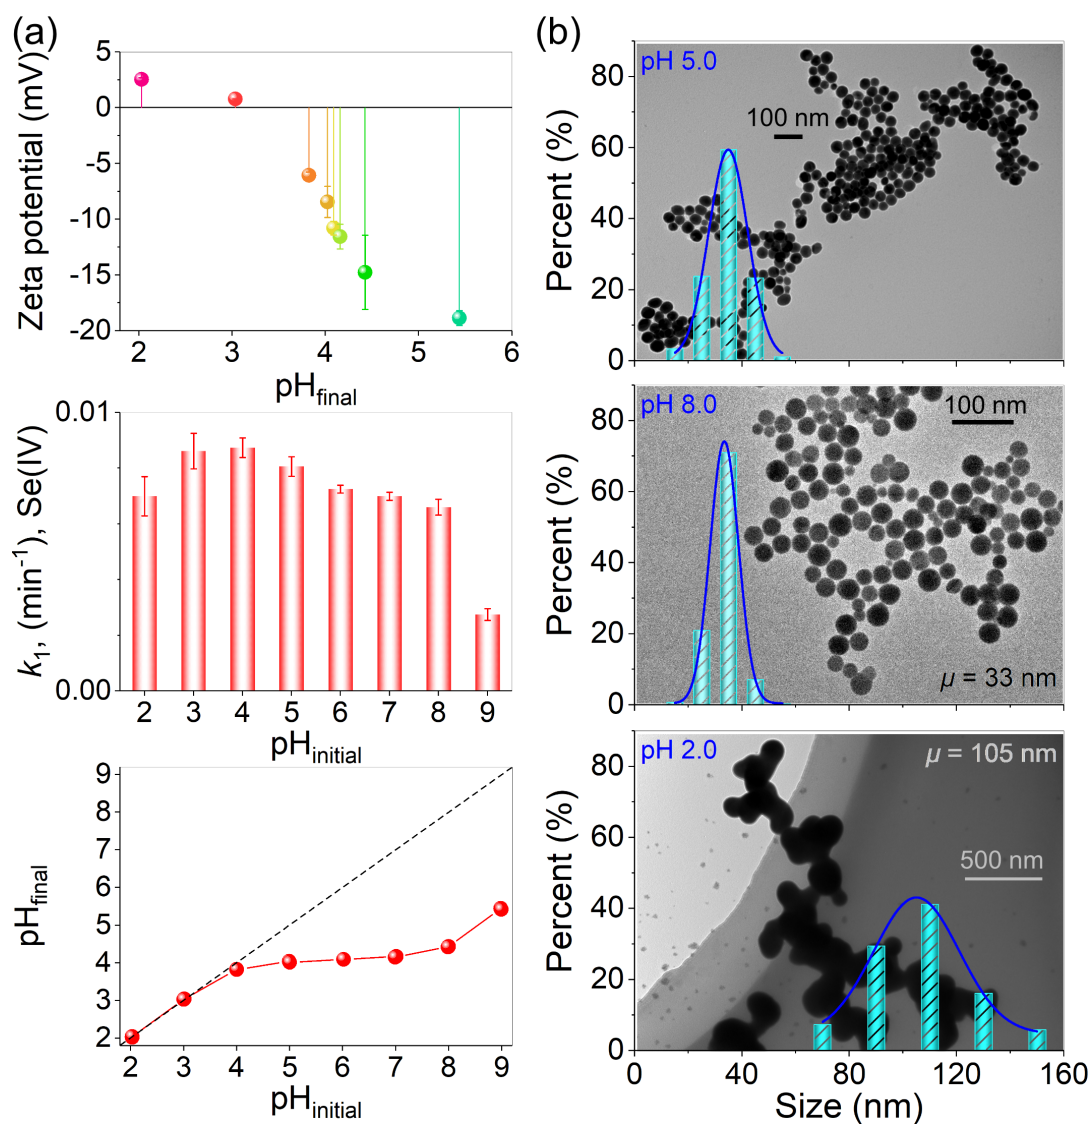

**Figure S4.** The surface charge (a) and size distributions (b) of the SeNSs obtained with AcAc at different pHs. [AcAc] = 1.0 mM, [Se(IV)] = 0.2 mM, light intensity: 5.0 mW·cm<sup>-2</sup> at 365 nm, irradiation time: 160 min.

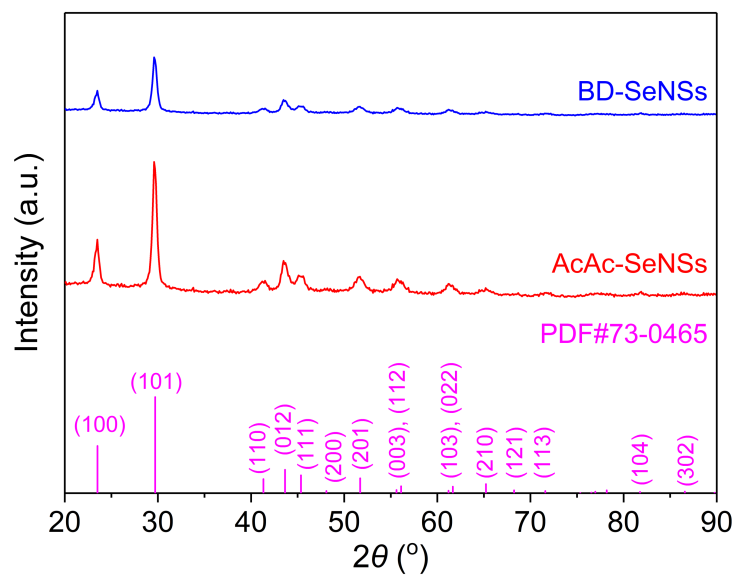

**Figure S5.** XRD pattern of the SeNSs obtained with AcAc and BD. The patterns are identical to the powder diffraction file (PDF card) JCPDS 73-0465.
